# Supplementary material for: Intense wind-driven coastal upwelling in the Balearic Islands in response to storm Blas (November 2021)
Source: Copernicus journal article supplement (doi:10.5194/sp-2022-9), 2022-09-30
Supplement: Supplementary file [file sp-2022-9-AC2-supplement.pdf]

## Sentinel3-OLCI Quality Index (QI)

$$QI = (\text{observation} - \text{climatological average}) / \text{climatological standard deviation}$$

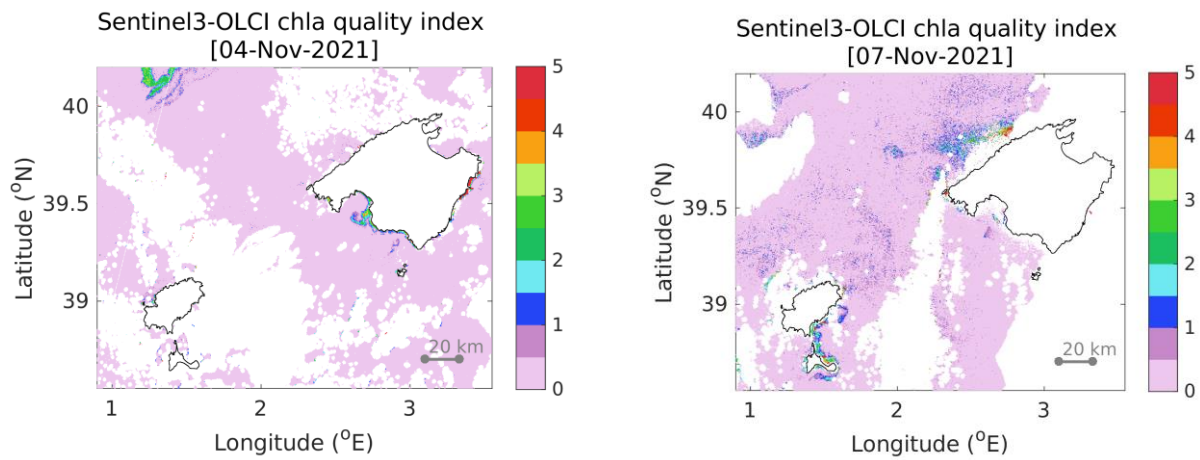

Figure R1: Quality Index (QI) of Sentinel3-OLCI chl-a images on (left) 4 and (right) 7 November 2021

## Lagrangian analysis of surface transports from Alcudia Bay

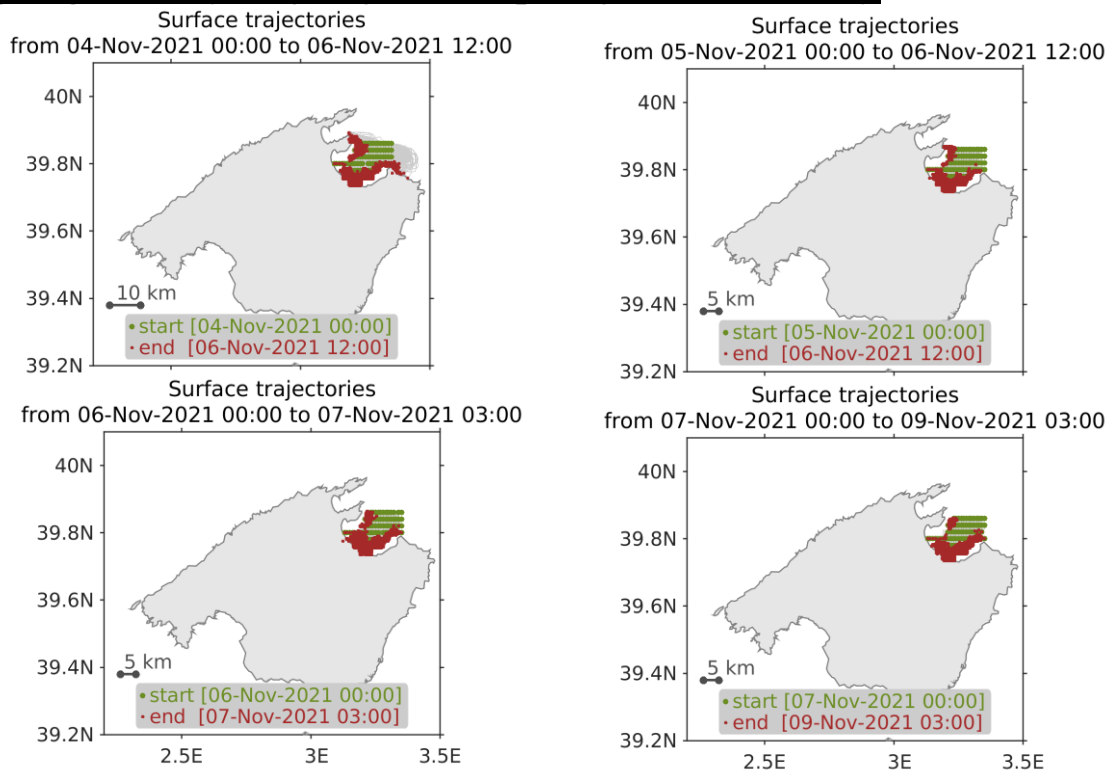

Figure R2: Surface trajectories of model particles seeded in Alcudia Bay on 4 (top-left), 5 (top-right), 6 (bottom-left) and 7 (bottom-right) November. The initial and final positions are represented by green and red dots, respectively.
